# Supplementary material for: LBX2-AS1 up-regulated by NFIC boosts cell proliferation, migration and invasion in gastric cancer through targeting miR-491-5p/ZNF703
Source: Cancer Cell Int. 2020 Apr 26;20:136. doi: 10.1186/s12935-020-01207-w (PMC7183605; doi:10.1186/s12935-020-01207-w)
Supplement: Supplementary file 3 — Additional file 3: Table S1 List of LBX2-AS1-bond miRNAs predicted by starBase. [file 12935_2020_1207_MOESM3_ESM.xls]

#please cite:
#Zhou KR, Liu S, Cai L, Bin L, et al. ENCORI: The Encyclopedia of RNA Interactomes.
#2.Li JH, et al.starBase v2.0: decoding miRNA-ceRNA, miRNA-ncRNA and protein-RNA interaction networks from large-scale CLIP-Seq data , Nucleic Acids Res. 2014 Jan;42:D92-7.
miRNAid	miRNAname	geneID	geneName	geneType	chromosome	start	end	strand	clipExpNum	degraExpNum	RBP	merClass	miRseq	align	targetSeq	pancancerNum
MIMAT0004697	hsa-miR-151a-5p	ENSG00000257702	LBX2-AS1	antisense	chr2	74729907	74729930	+	2	0	AGO2	8mer	ugaUCUGACACU-C--GAGGAGCu	| ||| || | |||||||	gggAAACUCCGACGCCCUCCUCGa	2
MIMAT0010214	hsa-miR-151b	ENSG00000257702	LBX2-AS1	antisense	chr2	74729910	74729930	+	2	0	AGO2	8mer	ucUGACACU-C--GAGGAGCu	||| || | |||||||	aaACUCCGACGCCCUCCUCGa	1
MIMAT0015023	hsa-miR-3150a-3p	ENSG00000257702	LBX2-AS1	antisense	chr2	74729934	74729955	+	2	0	AGO2	8mer	gguuggagcuccUAGAGGGGUc	| |||||||	uuuucuccccccAACUCCCCAa	1
MIMAT0027426	hsa-miR-6763-5p	ENSG00000257702	LBX2-AS1	antisense	chr2	74729937	74729955	+	2	0	AGO2	8mer	gaGGGGUCGGUGAGGGGUc	:||| | ||||||||	ucUCCCCCCAACUCCCCAa	4
MIMAT0003296	hsa-miR-627-5p	ENSG00000257702	LBX2-AS1	antisense	chr2	74729941	74729962	+	2	0	AGO2	7mer-m8	aggagaaaagaaucUCUGAGUg	|||||||	cccccaacuccccaAGACUCAc	1
MIMAT0015051	hsa-miR-3174	ENSG00000257702	LBX2-AS1	antisense	chr2	74729942	74729964	+	2	0	AGO2	7mer-m8	ccgagacguagagaUUGAGUGAu	:|||||||	ccccaacuccccaaGACUCACUu	3
MIMAT0003150	hsa-miR-455-5p	ENSG00000257702	LBX2-AS1	antisense	chr2	74730573	74730594	+	1	0	AGO1-4	7mer-m8	gcuacaucagguuuCCGUGUAu	|||||||	gggucuccggccucGGCACAUu	5
MIMAT0005951	hsa-miR-1307-3p	ENSG00000257702	LBX2-AS1	antisense	chr2	74730605	74730626	+	1	0	AGO1-4	7mer-m8	guGCUGGCUGCGGUGCGGCUCa	||:|: : | ||||||||	ccCGGCUUUUUCGACGCCGAGc	4
MIMAT0027499	hsa-miR-6799-3p	ENSG00000257702	LBX2-AS1	antisense	chr2	74730629	74730652	+	1	0	AGO1-4	7mer-m8	gacacccCUGUGGUA-CGUCCCGu	| | | || |||||||	ccgcccaGCCCCAAUGGCAGGGCc	2
MIMAT0019214	hsa-miR-3173-5p	ENSG00000257702	LBX2-AS1	antisense	chr2	74730632	74730652	+	1	0	AGO1-4	7mer-m8	uuuccucuuUUGUCCGUCCCGu	||: ||||||||	cccagccccAAU-GGCAGGGCc	0
MIMAT0015023	hsa-miR-3150a-3p	ENSG00000257702	LBX2-AS1	antisense	chr2	74730663	74730684	+	1	0	AGO1-4	7mer-m8	gguuggAGCUCCUA-GAGGGGUc	|| || | |||||||	ucccagUC-AGACUGCUCCCCAg	1
MIMAT0019853	hsa-miR-4731-5p	ENSG00000257702	LBX2-AS1	antisense	chr2	74730664	74730686	+	1	0	AGO1-4	7mer-m8	guGUGAGU-ACACCGGGGGUCGu	|| ||| || :|||||||	ccCAGUCAGACUGCUCCCCAGCu	0
MIMAT0027426	hsa-miR-6763-5p	ENSG00000257702	LBX2-AS1	antisense	chr2	74730665	74730684	+	1	0	AGO1-4	7mer-m8	gaggGGUC-GGUGAGGGGUc	:||| |::|||||||	ccagUCAGACUGCUCCCCAg	4
MIMAT0000080	hsa-miR-24-3p	ENSG00000257702	LBX2-AS1	antisense	chr2	74730722	74730745	+	2	0	AGO1-4	7mer-m8	gaCAAGGA--CGACUUGACUCGGu	|||:|| || |||||||	gcGUUUCUACUCUCCCCUGAGCCc	8
MIMAT0001075	hsa-miR-384	ENSG00000257702	LBX2-AS1	antisense	chr2	74730751	74730770	+	2	0	AGO1-4	8mer	auacuuguUAAAGAUCCUUa	| | |||||||	aucccgucACUCCUAGGAAa	0
MIMAT0004952	hsa-miR-665	ENSG00000257702	LBX2-AS1	antisense	chr2	74730772	74730793	+	2	0	AGO1-4	8mer	uccccgGAGUC--GGAGGACCa	| ||| |||||||	uuuucgCGCAGAAACUCCUGGa	3
MIMAT0007885	hsa-miR-1911-5p	ENSG00000257702	LBX2-AS1	antisense	chr2	74730792	74730819	+	1	0	AGO1-4	7mer-m8	gggUUGUCUGUACCG-----CCAUGAGu	||||| | ||| |||||||	gagAACAGCCCCGGCCGCCAGGUACUCg	7
MIMAT0015051	hsa-miR-3174	ENSG00000257702	LBX2-AS1	antisense	chr2	74731194	74731217	+	1	0	AGO2	7mer-m8	ccgagacGUAGAGAU-UGAGUGAu	| || ||: |||||||	aggccgcCUUCGCUGUACUCACUc	3
MIMAT0017989	hsa-miR-3612	ENSG00000257702	LBX2-AS1	antisense	chr2	74731206	74731227	+	1	0	AGO2	7mer-m8	agguaaagaguucuACGGAGGa	|||||||	cuguacucacucucUGCCUCCc	0
MIMAT0003320	hsa-miR-650	ENSG00000257702	LBX2-AS1	antisense	chr2	74731207	74731227	+	1	0	AGO2	7mer-m8	caggacucucGCGACGGAGGa	| ||||||||	uguacucacuCUCUGCCUCCc	1
MIMAT0019948	hsa-miR-4784	ENSG00000257702	LBX2-AS1	antisense	chr2	74731589	74731607	+	2	0	AGO1-4	7mer-m8	aguCAGGGUCGUAGAGGAGu	| ||: || |||||||	guuGCCCUUGC-UCUCCUCc	1
MIMAT0018194	hsa-miR-3150b-3p	ENSG00000257702	LBX2-AS1	antisense	chr2	74731590	74731607	+	2	0	AGO1-4	7mer-m8	gguuGGAGCUGCUAGAGGAGu	|||:| | |||||||	uugcCCUUG-C--UCUCCUCc	2
MIMAT0018194	hsa-miR-3150b-3p	ENSG00000257702	LBX2-AS1	antisense	chr2	74731605	74731627	+	2	1	AGO1-4	7mer-m8	gguUGGAGCU--GCUAGAGGAGu	|| || : | |||||||	uccACAUCAGCUCCCUCUCCUCc	2
MIMAT0019948	hsa-miR-4784	ENSG00000257702	LBX2-AS1	antisense	chr2	74731608	74731627	+	2	1	AGO1-4	7mer-m8	agucagggucGUAGAGGAGu	| |||||||	acaucagcucCCUCUCCUCc	1
MIMAT0002807	hsa-miR-491-5p	ENSG00000257702	LBX2-AS1	antisense	chr2	74731626	74731647	+	3	0	AGO1-4,AGO2	7mer-m8	ggaguaccuucccAAGGGGUGa	||||||||	ccucagcuacuuaUUCCCCACc	4
MIMAT0004675	hsa-miR-219a-2-3p	ENSG00000257702	LBX2-AS1	antisense	chr2	74731702	74731726	+	3	0	AGO1-4	7mer-m8	ugucuacAGGUCGG---UGUUAAGa	|||| :: |||||||	cuaagccUCCAUUUCUGACAAUUCc	5
MIMAT0019064	hsa-miR-4525	ENSG00000257702	LBX2-AS1	antisense	chr2	74731764	74731784	+	3	0	AGO1-4	8mer	uuggucGUACGUGUAGGGGGg	::| | ||||||||	ccuuuuUGUCCCCAUCCCCCa	0
MIMAT0021043	hsa-miR-5010-5p	ENSG00000257702	LBX2-AS1	antisense	chr2	74731765	74731784	+	3	0	AGO1-4	8mer	uuAAAACGAGACGGUAGGGGGa	|||||: | |||||||||	cuUUUUGUCC--CCAUCCCCCa	0
