# Supplementary material for: LBX2-AS1 up-regulated by NFIC boosts cell proliferation, migration and invasion in gastric cancer through targeting miR-491-5p/ZNF703
Source: Cancer Cell Int. 2020 Apr 26;20:136. doi: 10.1186/s12935-020-01207-w (PMC7183605; doi:10.1186/s12935-020-01207-w)
Supplement: Supplementary file 5 — Additional file 5: Table 2 List of miR-491-5p-targeted mRNAs predicted by starBase. [file 12935_2020_1207_MOESM5_ESM.xls]

#please cite:
#Zhou KR, Liu S, Cai L, Bin L, et al. ENCORI: The Encyclopedia of RNA Interactomes.
#2.Li JH, et al.starBase v2.0: decoding miRNA-ceRNA, miRNA-ncRNA and protein-RNA interaction networks from large-scale CLIP-Seq data , Nucleic Acids Res. 2014 Jan;42:D92-7.
miRNAid	miRNAname	geneID	geneName	geneType	chromosome	narrowStart	narrowEnd	broadStart	broadEnd	strand	clipExpNum	degraExpNum	RBP	PITA	RNA22	miRmap	microT	miRanda	PicTar	TargetScan	pancancerNum
MIMAT0002807	hsa-miR-491-5p	ENSG00000011009	LYPLA2	protein_coding	chr1	24121315	24121321	24121294	24121322	+	8	0	AGO1,AGO1-4,AGO2	1	0	1	1	1	0	0	1
MIMAT0002807	hsa-miR-491-5p	ENSG00000011009	LYPLA2	protein_coding	chr1	24121786	24121792	24121765	24121793	+	1	6	AGO1-4	1	0	1	1	1	0	0	1
MIMAT0002807	hsa-miR-491-5p	ENSG00000162734	PEA15	protein_coding	chr1	160184209	160184215	160184188	160184216	+	9	2	AGO1-4,AGO2	1	0	1	1	1	0	0	2
MIMAT0002807	hsa-miR-491-5p	ENSG00000166337	TAF10	protein_coding	chr11	6632111	6632116	6632110	6632131	-	6	3	AGO1,AGO1-4,AGO2	1	0	1	0	1	1	1	6
MIMAT0002807	hsa-miR-491-5p	ENSG00000182704	TSKU	protein_coding	chr11	76507992	76507998	76507971	76507999	+	6	0	AGO1-4,AGO2	1	0	1	1	1	0	1	4
MIMAT0002807	hsa-miR-491-5p	ENSG00000139645	ANKRD52	protein_coding	chr12	56635407	56635412	56635406	56635434	-	15	1	AGO1-4,AGO2	1	0	1	1	0	1	0	1
MIMAT0002807	hsa-miR-491-5p	ENSG00000139645	ANKRD52	protein_coding	chr12	56636224	56636229	56636223	56636251	-	13	0	AGO1-4,AGO2	1	0	1	1	0	1	0	1
MIMAT0002807	hsa-miR-491-5p	ENSG00000139645	ANKRD52	protein_coding	chr12	56636352	56636358	56636351	56636379	-	11	0	AGO1-4,AGO2	1	0	1	1	1	0	0	1
MIMAT0002807	hsa-miR-491-5p	ENSG00000066117	SMARCD1	protein_coding	chr12	50494102	50494108	50494081	50494109	+	3	0	AGO1-4,AGO2	1	0	0	1	1	1	1	2
MIMAT0002807	hsa-miR-491-5p	ENSG00000156030	ELMSAN1	protein_coding	chr14	74182289	74182295	74182288	74182316	-	6	0	AGO1-4,AGO2	1	0	1	1	1	0	0	2
MIMAT0002807	hsa-miR-491-5p	ENSG00000156030	ELMSAN1	protein_coding	chr14	74182747	74182753	74182746	74182774	-	1	0	AGO1-4	1	0	1	1	1	0	0	2
MIMAT0002807	hsa-miR-491-5p	ENSG00000156030	ELMSAN1	protein_coding	chr14	74184326	74184332	74184325	74184353	-	6	0	AGO1,AGO1-4,AGO2	1	0	1	1	1	0	0	2
MIMAT0002807	hsa-miR-491-5p	ENSG00000180357	ZNF609	protein_coding	chr15	64978149	64978155	64978128	64978156	+	2	1	AGO1-4,AGO2	1	0	1	1	1	0	0	1
MIMAT0002807	hsa-miR-491-5p	ENSG00000102901	CENPT	protein_coding	chr16	67862093	67862099	67862092	67862120	-	4	0	AGO1-4,AGO2	1	0	1	1	1	0	0	3
MIMAT0002807	hsa-miR-491-5p	ENSG00000102901	CENPT	protein_coding	chr16	67862138	67862144	67862137	67862165	-	3	4	AGO1-4,AGO2	1	0	1	1	1	0	0	3
MIMAT0002807	hsa-miR-491-5p	ENSG00000168411	RFWD3	protein_coding	chr16	74655456	74655462	74655455	74655483	-	10	3	AGO1,AGO1-4,AGO2	1	0	1	1	1	0	0	6
MIMAT0002807	hsa-miR-491-5p	ENSG00000103495	MAZ	protein_coding	chr16	29822359	29822365	29822338	29822366	+	16	11	AGO1,AGO1-4,AGO2	1	0	1	1	1	0	0	3
MIMAT0002807	hsa-miR-491-5p	ENSG00000153815	CMIP	protein_coding	chr16	81744676	81744682	81744655	81744683	+	7	0	AGO1-4,AGO2	1	0	1	1	1	0	0	3
MIMAT0002807	hsa-miR-491-5p	ENSG00000108262	GIT1	protein_coding	chr17	27900904	27900910	27900903	27900931	-	2	5	AGO2	1	0	1	1	1	0	0	2
MIMAT0002807	hsa-miR-491-5p	ENSG00000108262	GIT1	protein_coding	chr17	27901131	27901137	27901130	27901158	-	2	0	AGO1-4,AGO2	1	0	1	1	1	0	0	2
MIMAT0002807	hsa-miR-491-5p	ENSG00000108262	GIT1	protein_coding	chr17	27901640	27901646	27901639	27901667	-	5	0	AGO1-4,AGO2	1	0	1	1	1	0	0	2
MIMAT0002807	hsa-miR-491-5p	ENSG00000184640	9-Sep	protein_coding	chr17	75494850	75494856	75494829	75494857	+	5	0	AGO1-4,AGO2	1	0	1	1	1	0	0	7
MIMAT0002807	hsa-miR-491-5p	ENSG00000072062	PRKACA	protein_coding	chr19	14203674	14203680	14203673	14203701	-	3	1	AGO1-4	1	0	1	1	1	0	0	1
MIMAT0002807	hsa-miR-491-5p	ENSG00000104936	DMPK	protein_coding	chr19	46273028	46273034	46273027	46273055	-	4	1	AGO1-4,AGO2	1	0	1	1	1	1	1	6
MIMAT0002807	hsa-miR-491-5p	ENSG00000075785	RAB7A	protein_coding	chr3	128533424	128533430	128533403	128533431	+	1	0	AGO1-4	1	0	1	1	1	0	0	4
MIMAT0002807	hsa-miR-491-5p	ENSG00000049540	ELN	protein_coding	chr7	73483573	73483576	73483549	73483594	+	3	3	AGO1-4	1	0	1	2	1	0	0	4
MIMAT0002807	hsa-miR-491-5p	ENSG00000049540	ELN	protein_coding	chr7	73483858	73483864	73483837	73483880	+	1	2	AGO1-4	1	0	1	2	1	0	0	4
MIMAT0002807	hsa-miR-491-5p	ENSG00000183779	ZNF703	protein_coding	chr8	37556305	37556310	37556283	37556326	+	30	0	AGO1,AGO1-4,AGO2,AGO3,AGO4	1	0	1	2	2	0	0	4
MIMAT0002807	hsa-miR-491-5p	ENSG00000198910	L1CAM	protein_coding	chrX	153127979	153127985	153127978	153128006	-	1	3	AGO2	1	0	1	1	1	0	0	4
MIMAT0002807	hsa-miR-491-5p	ENSG00000147065	MSN	protein_coding	chrX	64959799	64959804	64959777	64959805	+	12	5	AGO1,AGO1-4,AGO2	1	0	1	1	1	1	0	4
MIMAT0002807	hsa-miR-491-5p	ENSG00000203879	GDI1	protein_coding	chrX	153671752	153671758	153671731	153671759	+	11	0	AGO1,AGO1-4,AGO2	1	0	1	1	1	0	0	1
